# Supplementary material for: Pharmacokinetic, Metabolomic, and Stability Assessment of Ganoderic Acid H Based Triterpenoid Enriched Fraction of Ganoderma lucidum P. Karst
Source: MDPI journal article supplement (doi:10.3390/metabo12020097), 2022-01-21
Supplement: s1 [file s1]

## Supplementary Data

**Figure S1:** Representative HPLC chromatogram ganoderic acid H

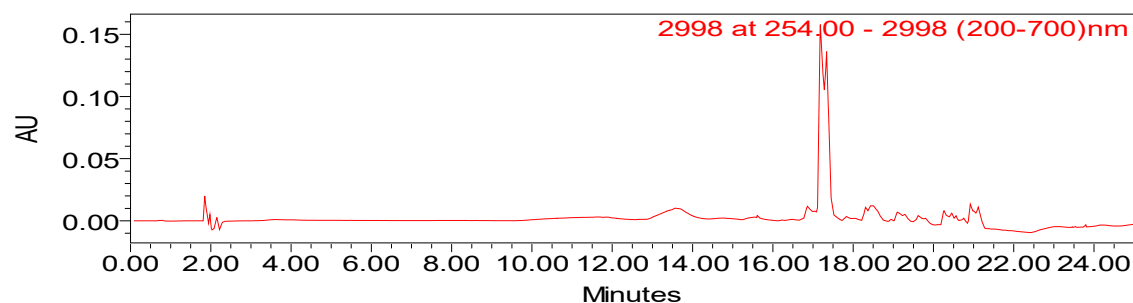

**Figure S2:** Representative HPLC chromatogram ganoderic acid H in mixture of other standards

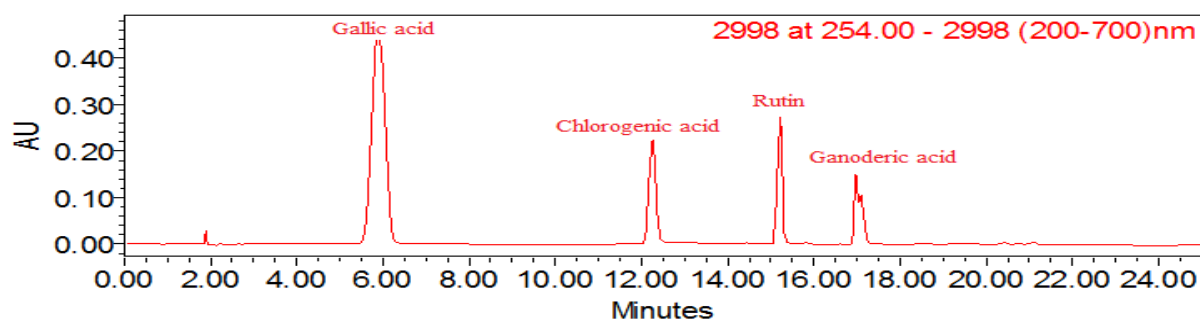

**Figure S3:** Representative HPLC chromatogram of TEF

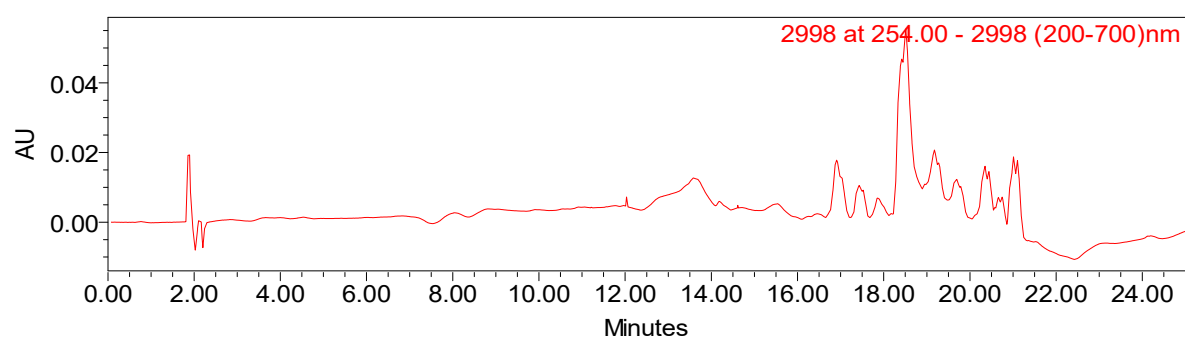

**Figure S4:** UV spectrum of ganoderic acid H

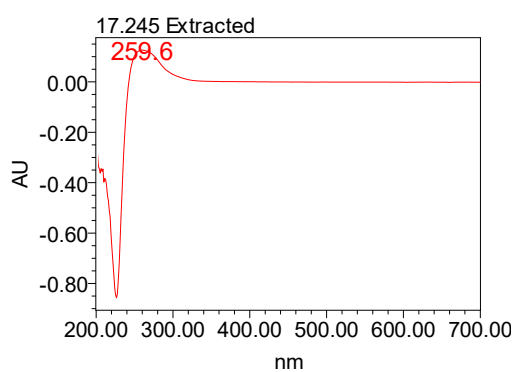

**Figure S5:** Representative UHPLC chromatogram of TEF

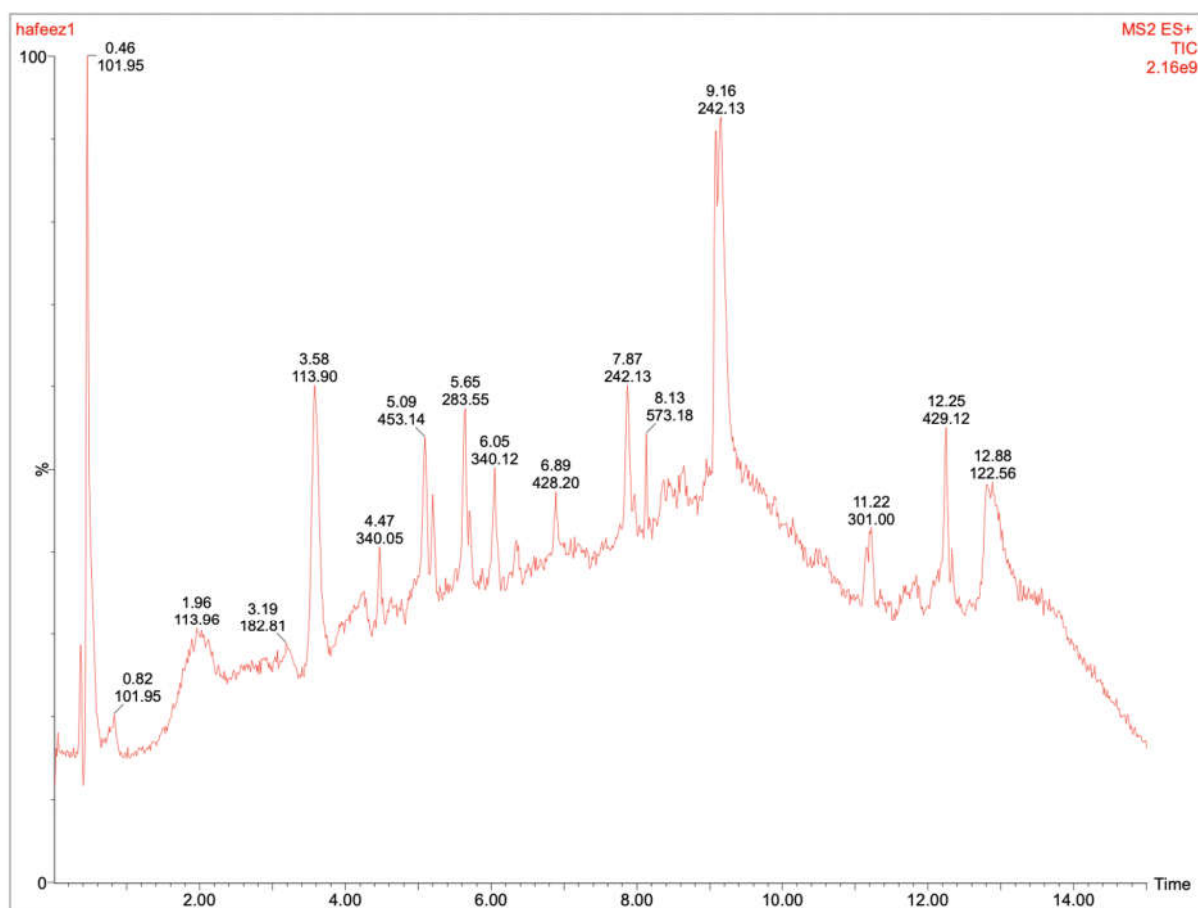

**Figure S6:** UPLC-MS chromatogram of TEF extracted at MS 573 showing of GA-H at  $R_t$  8.14 min.

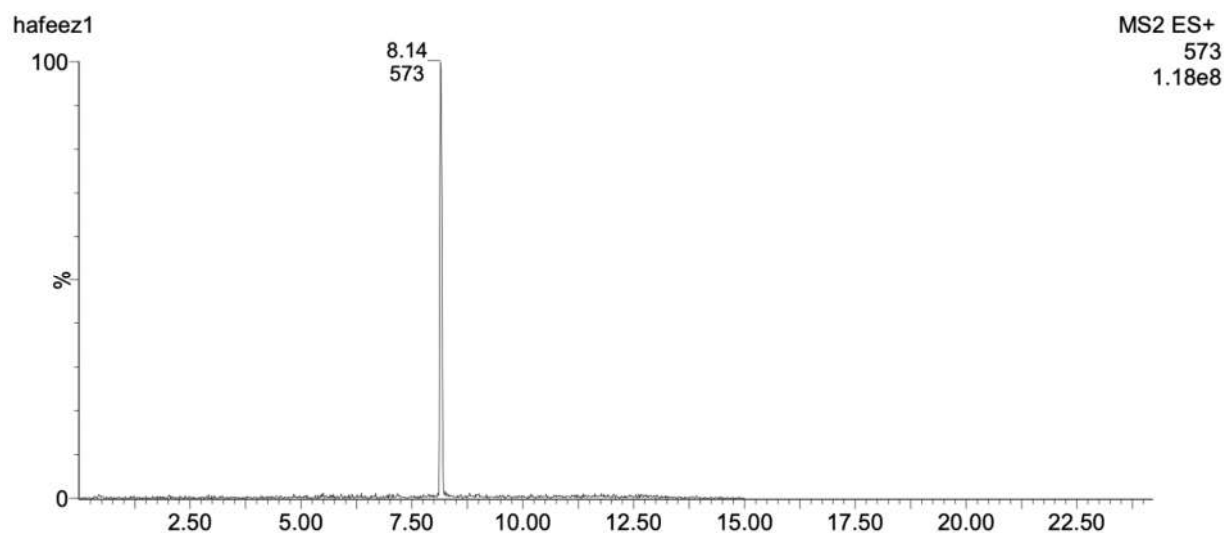

**Figure S7:** Representative GC-MS chromatogram of TEF.

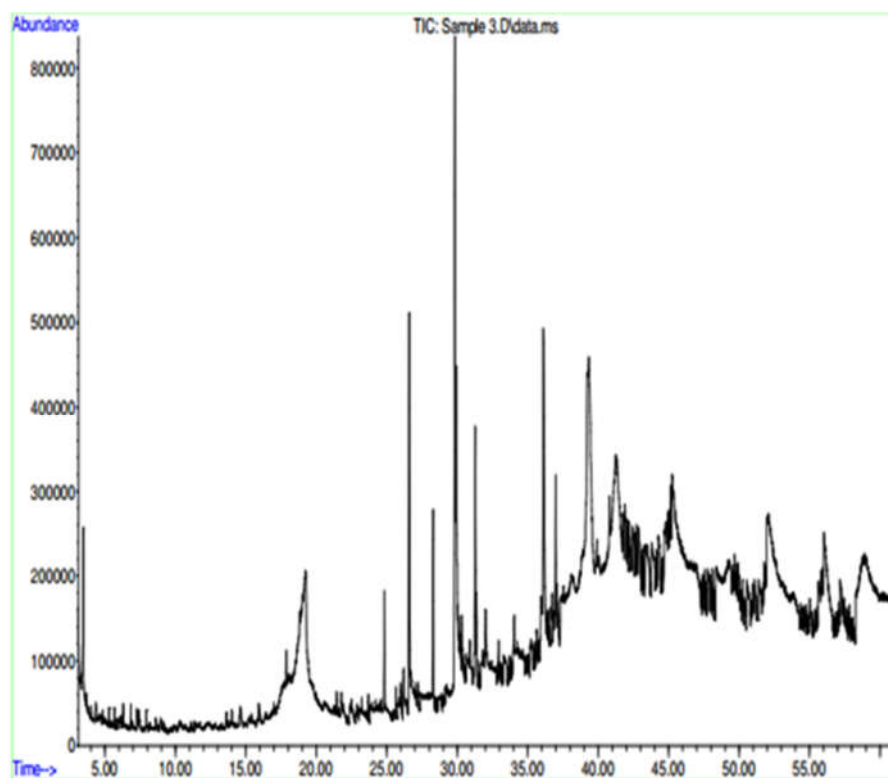

**Figure S8:** Biplot derived from multivariate statistical analysis

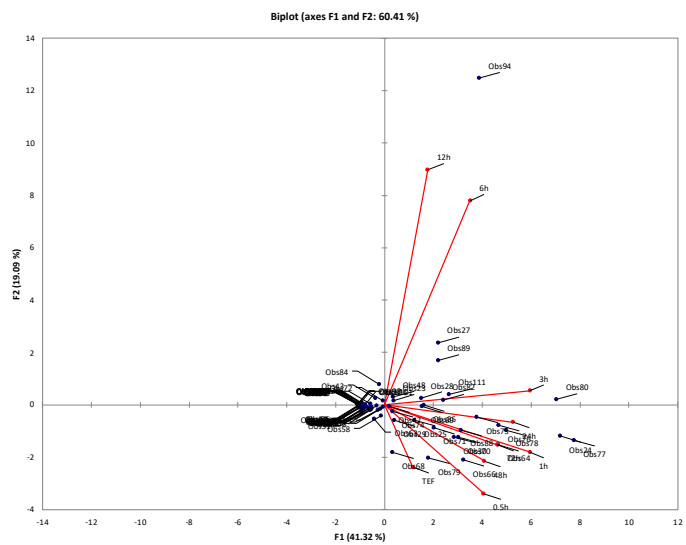

**Table S1:** Robustness parameters of method validation

| Parameters                                   |                        | GA-H Spiked to matrix (ng/mL) | % recovery (Mean $\pm$ %RSD) |
|----------------------------------------------|------------------------|-------------------------------|------------------------------|
| Change in initial mobile phase composition   | Methanol:Water (5:95)  | 200                           | 89.2 $\pm$ 0.31              |
|                                              | Methanol:Water (10:90) | 200                           | 94.5 $\pm$ 0.31              |
|                                              | Methanol:Water (15:85) | 200                           | 93.4 $\pm$ 0.39              |
| Change in column temperature ( $^{\circ}$ C) | 25                     | 200                           | 93.4 $\pm$ 0.22              |
|                                              | 30                     | 200                           | 94.3 $\pm$ 0.31              |
|                                              | 35                     | 200                           | 96.7 $\pm$ 0.82              |
| Change in Flow Rate (mL/min)                 | 0.9                    | 200                           | 92.1 $\pm$ 0.63              |
|                                              | 1.0                    | 200                           | 93.4 $\pm$ 0.43              |
|                                              | 1.1                    | 200                           | 91.1 $\pm$ 0.31              |

**Table S2:** Intra-day and inter-day precision data of method validation

| Metabolite | Conc. (ng/mL) | Inter-day                |      | Intra-day                |      |
|------------|---------------|--------------------------|------|--------------------------|------|
|            |               | Mean Peak area $\pm$ SEM | %RSD | Mean Peak area $\pm$ SEM | %RSD |
| GA-H       | 100           | 7036.45 $\pm$ 34.5       | 0.94 | 7089.15 $\pm$ 89.6       | 2.3  |
|            | 200           | 13408.51 $\pm$ 245.5     | 2.67 | 13313.2 $\pm$ 132.5      | 1.98 |

**Table S3.** GC-MS profiling of TEF and unknown major compounds

| Compound | R <sub>t</sub> (min) | Area    | Area % |
|----------|----------------------|---------|--------|
| Unknown  | 18.06                | 123512  | 0.01   |
| Unknown  | 18.68                | 2572336 | 0.61   |
| Unknown  | 18.83                | 6256562 | 1.49   |
| Unknown  | 23.95                | 1320054 | 0.31   |
| Unknown  | 24.59                | 1452603 | 0.34   |
| Unknown  | 24.83                | 5279964 | 1.26   |
| Unknown  | 25.66                | 1424588 | 0.34   |
| Unknown  | 26.00                | 1607521 | 0.38   |
| Unknown  | 26.21                | 2996981 | 0.71   |

|         |       |          |       |
|---------|-------|----------|-------|
| Unknown | 26.39 | 1217017  | 0.29  |
| Unknown | 27.05 | 1859504  | 0.44  |
| Unknown | 27.24 | 1409335  | 0.33  |
| Unknown | 27.41 | 495330   | 0.11  |
| Unknown | 29.32 | 258034   | 0.06  |
| Unknown | 34.27 | 2837571  | 0.68  |
| Unknown | 35.64 | 3471950  | 0.83  |
| Unknown | 35.95 | 7782425  | 1.86  |
| Unknown | 36.46 | 2992481  | 0.71  |
| Unknown | 36.73 | 5052431  | 1.21  |
| Unknown | 36.99 | 8990086  | 2.15  |
| Unknown | 37.41 | 6736045  | 1.61  |
| Unknown | 37.54 | 4161809  | 0.99  |
| Unknown | 38.12 | 4084632  | 0.97  |
| Unknown | 38.94 | 19518215 | 4.67  |
| Unknown | 39.24 | 35736288 | 8.56  |
| Unknown | 39.33 | 64132693 | 15.37 |
| Unknown | 40.92 | 7140276  | 1.71  |
| Unknown | 42.42 | 9407898  | 2.25  |
| Unknown | 42.51 | 5030878  | 1.20  |
| Unknown | 42.88 | 13167892 | 3.15  |
| Unknown | 43.16 | 3084226  | 0.73  |
| Unknown | 43.49 | 9158208  | 2.19  |
| Unknown | 44.63 | 3473825  | 0.83  |
| Unknown | 50.02 | 3056633  | 0.73  |
| Unknown | 51.98 | 5360617  | 1.28  |
| Unknown | 56.03 | 11588132 | 2.77  |
